# Supplementary material for: Use of vonoprazan for management of systemic sclerosis-related gastroesophageal reflux disease
Source: PubMed Central journal article supplement — Biomed Rep. 2020 Dec 17;14(2):25. doi: 10.3892/br.2020.1401 (PMC7780750; doi:10.3892/br.2020.1401), 2020-12-17

Figure S1. Treatments received prior to initiation of vonoprazan. (A) Previous treatments before vonoprazan therapy included esomeprazole (20 mg/day), lansoprazole (30 mg/day), rabeprazole (10 mg/day) and famotidine 20 mg/day. (B) A total of 11 (73%) patients received a prokinetic agent and 4 did not before vonoprazan treatment.

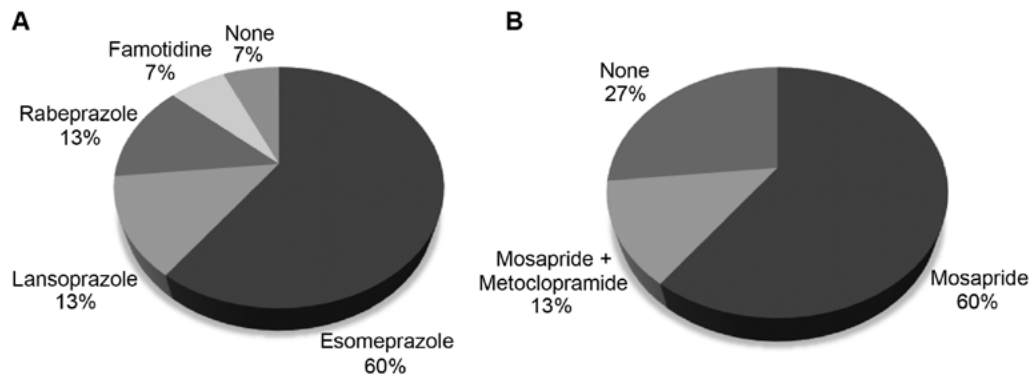

Supplement: Supplementary_Data.pdf [file Supplementary_Data.pdf]
